# Supplementary material for: Promiscuity of response regulators for thioredoxin steers bacterial virulence
Source: Springer Nature journal article supplement (doi:10.1038/s41467-022-33983-6), 2022-10-20
Supplement: MOESM1 [file 41467_2022_33983_MOESM1_ESM.pdf]

Promiscuity of response regulators for thioredoxin steers bacterial virulence

Ju-Sim Kim<sup>1,#</sup>, Alexandra Born<sup>2,#</sup>, James Till<sup>1</sup>, Lin Liu<sup>1</sup>, Sashi Kant<sup>1</sup>, Morkos A. Henen<sup>2,3</sup>,  
Beat Vögeli<sup>2</sup>, and Andrés Vázquez-Torres<sup>1,3\*</sup>

<sup>1</sup>University of Colorado School of Medicine, Department of Immunology & Microbiology,  
Aurora, Colorado, USA

<sup>2</sup>University of Colorado School of Medicine, Department of Biochemistry & Molecular  
Genetics, Aurora, Colorado, USA

<sup>3</sup>Faculty of Pharmacy, Mansoura University, Mansoura 35516, Egypt

<sup>4</sup>Veterans Affairs Eastern Colorado Health Care System, Denver, Colorado, USA

#Equal contribution

\*Corresponding Author: [Andres.Vazquez-Torres@cuanschutz.edu](mailto:Andres.Vazquez-Torres@cuanschutz.edu),

## Supplementary Figures

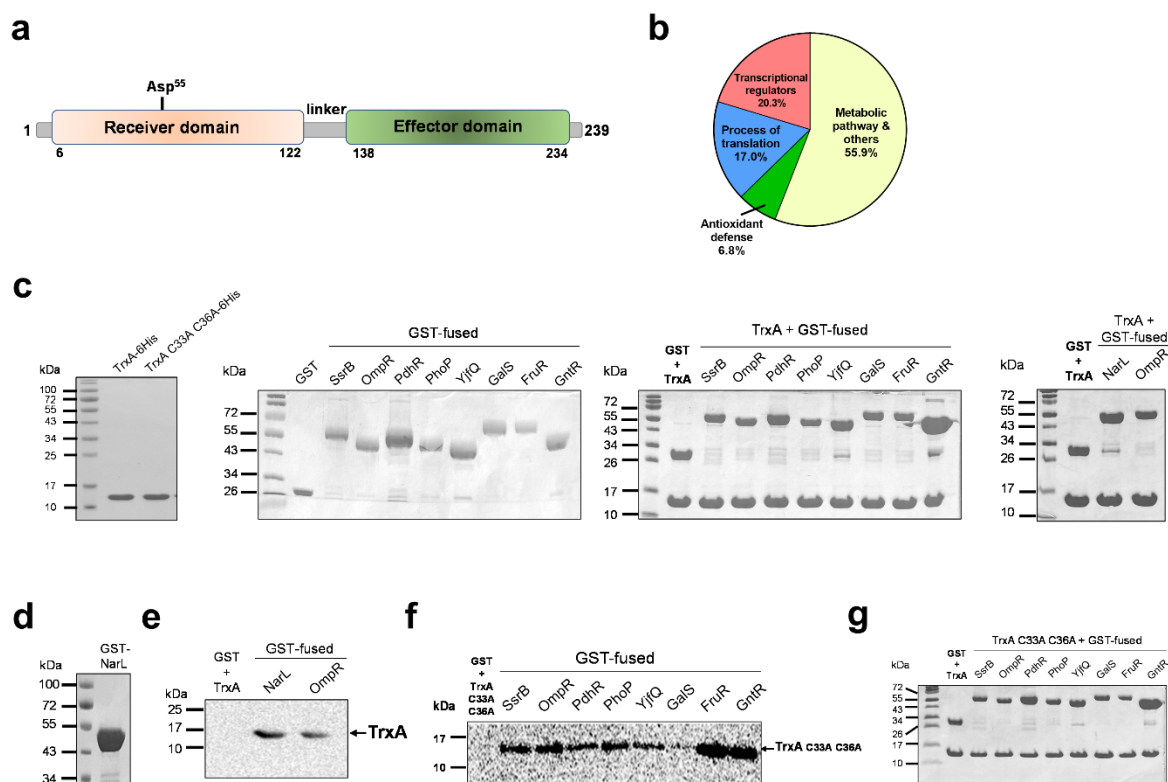

**Fig S1. Thioredoxin binds to multiple transcriptional regulators.** (A) Scheme of the response regulator OmpR with predicted receiver (orange box) and effector (green box) domains, the linker, and phosphorylatable Asp<sup>55</sup> in the receiver domain. The total number of amino acid residues and the number of amino acids corresponding to each domain are indicated. (B) Protein classes identified by mass spectrometry to bind to *Salmonella* thioredoxin. The pie chart shows selected proteins based on peptide identification from mass spectrometry with a probability greater than 95%. (C, D and G) Purified recombinant proteins and input proteins analyzed in pull-down assays were evaluated by SDS-PAGE gels and visualized by Coomassie Brilliant Blue staining. The gels are representative of 3 independent experiments. (E) Interactions of TrxA protein (i.e., prey) with recombinant GST-NarL (i.e., bait) were determined in a biochemical pull-down assay using immunoblotting. TrxA proteins were detected by Western blots using anti-His antibodies. GST and GST-OmpR were used as negative and positive controls, respectively. The data are representative of 3 independent experiments. (F) The binding of the TrxA C33A C36A variant lacking key cysteine residues in thioredoxin oxidoreductase catalytic domain (i.e., prey) to GST-tagged fusion recombinant proteins (i.e., bait) was assessed by biochemical pull-down assays. GST was used as a negative control. TrxA variants were probed by immunoblotting using anti-His antibodies. The data are representative of 3 independent experiments. Source data are provided as a Source Data file.

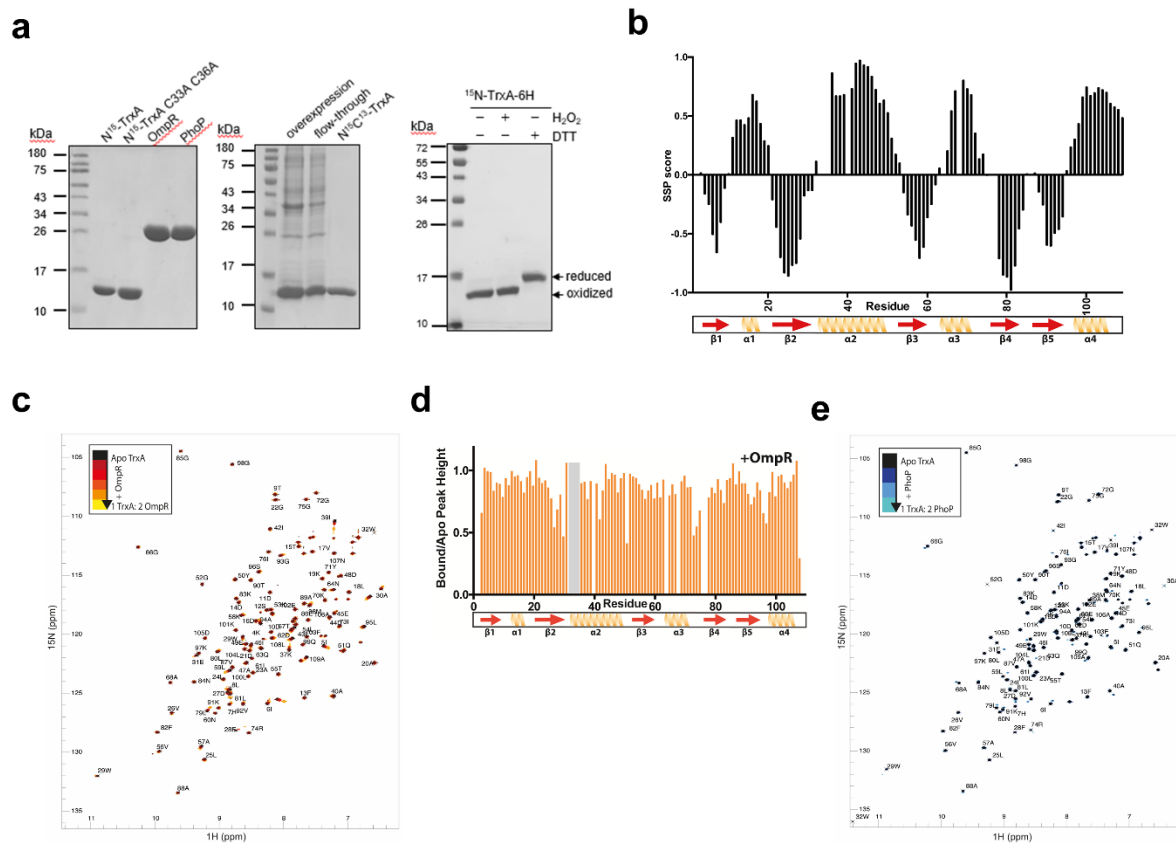

**Fig S2. The TrxA binding interface is shared between OmpR and PhoP.** (A) Purified  $^{15}\text{N}$ -TrxA,  $^{15}\text{N}$ ,  $^{13}\text{C}$ -TrxA and unlabeled OmpR and PhoP proteins were assessed on SDS-PAGE gels. Thiol redox state in cysteine residues of  $^{15}\text{N}$  TrxA was evaluated by AMS. Proteins were treated with 1 mM  $\text{H}_2\text{O}_2$  or 1 mM DTT at  $37^\circ\text{C}$  for 1 h. Specimens were visualized by Coomassie Brilliant Blue staining after separation in non-reducing SDS-PAGE. The gels are representative of 2 independent experiments. (B) Secondary structure propensity (SSP) scores for apo TrxA calculated using  $\text{H}^{\text{N}}$ ,  $^{15}\text{N}$ ,  $^{13}\text{C}\alpha$ , and  $^{13}\text{C}\beta$  chemical shifts for each assigned residue. A score of “+1” indicates a fully formed  $\alpha$ -helix while “-1” indicates a  $\beta$ -sheet, with “0” indicating disorder. (C and E) Overlay of full  $^{15}\text{N}$ -HSQC spectra of backbone NH resonance assigned apo TrxA (black) with increasing amounts of either unlabeled OmpR (yellow) or PhoP (blue). (D) Relative peak intensity quenching in  $^{15}\text{N}$ -HSQC spectra of TrxA upon 1:2 titration with unlabeled OmpR. We were unable to assign the spectra for the grey region. Source data are provided as a Source Data file.

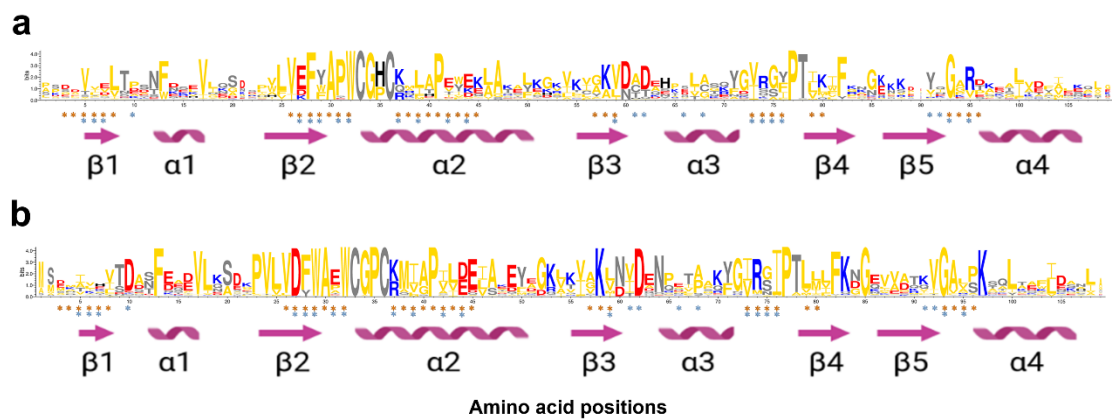

**Fig. S3. Conservation of thioredoxin residues.** (A) Weblogo3 representation of residue conservation across the results of a stringent PHMMER search that excluded bacterial proteins after full-length sequence alignment by Clustal Omega (1-3). The results include 3,184 eukaryotic, 84 archaeal, and 1 viral sequences with e-values of  $\leq 10^{-23}$  with a BLOSSUM90 matrix and gap and extension penalty of 0. (B) Weblogo3 representation of residue conservation when using the HMMER results from (A) to probe only bacterial proteins after full-length sequence alignment by Clustal Omega. The bacterial results include 3,540 sequences with e-values of  $\leq 10^{-32}$  when bias filtering was excluded.

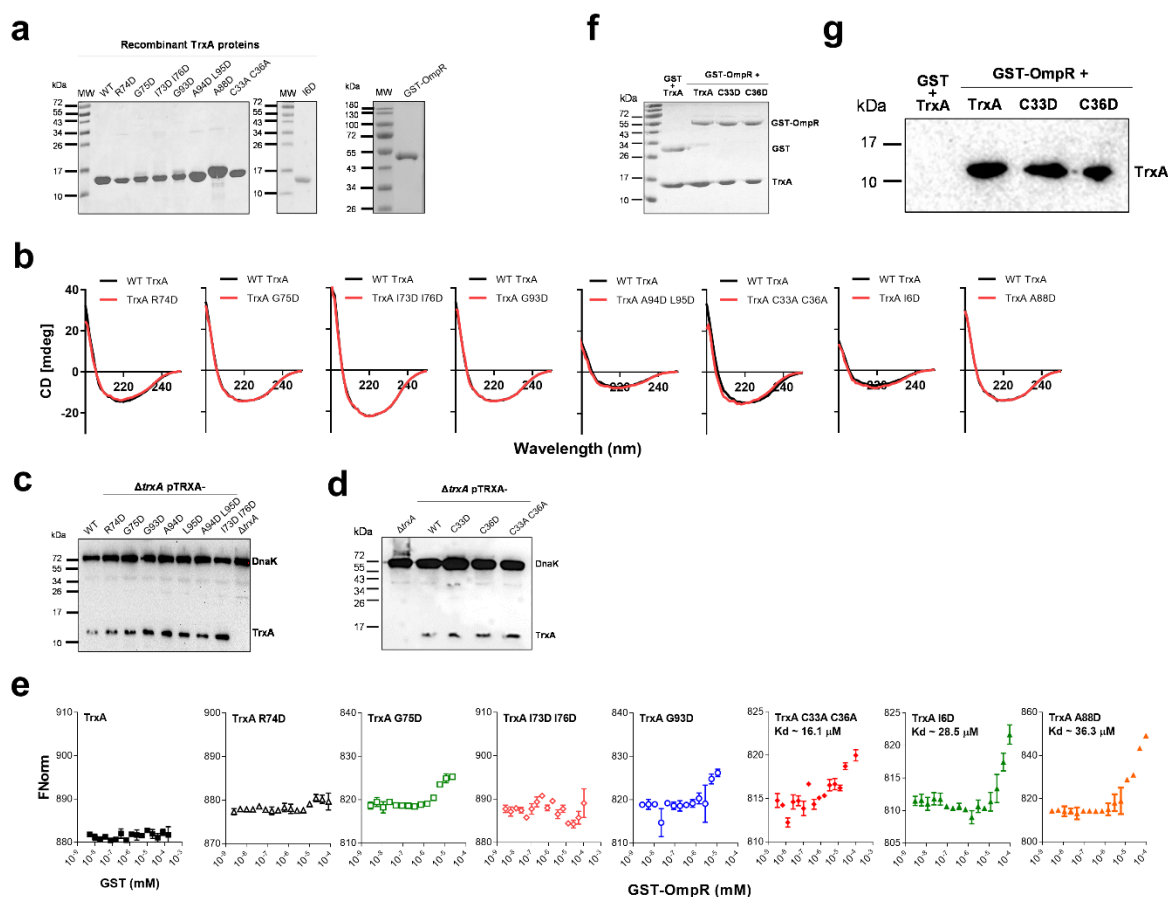

**Fig. S4. Characterization of the TrxA interfacial residues that interact with OmpR.** (A and F) Purified recombinant proteins and input proteins analyzed in pull-down assays were evaluated on SDS-PAGE gels and visualized by Imperial Coomassie Brilliant Blue staining. . The gels are representative of 3 independent experiments. (B) The secondary structure of TrxA variants was evaluated by CD spectroscopy. Each spectrum is the average of 3 independent scans from 2 separate experiments. (C and D) The expression of wildtype TrxA protein or its variants was assessed by immunoblotting of soluble extracts isolated from the indicated *Salmonella* strains grown overnight in LB broth. The blots are representative of 4-5 independent experiments. Expression of the housekeeping chaperone DnaK was monitored as an internal control. (E) Binding of TrxA variants to GST::OmpR was assessed by microscale thermophoresis. GST was used as a negative control. The  $K_d$  values that could be statistically fitted to the data are displayed. The data are the mean  $\pm$  SD ( $n = 2$  for all except  $n = 3$  for TrxA C33A C36A) from 2 independent experiments. (G) Interactions of TrxA variants (i.e., prey) with recombinant GST-OmpR (i.e., bait) were analyzed in pull-down assays using immunoblotting. TrxA proteins were detected by immunoblotting using anti-His antibodies. GST was used as negative. The data are representative of 3 independent experiments. Source data are provided as a Source Data file.

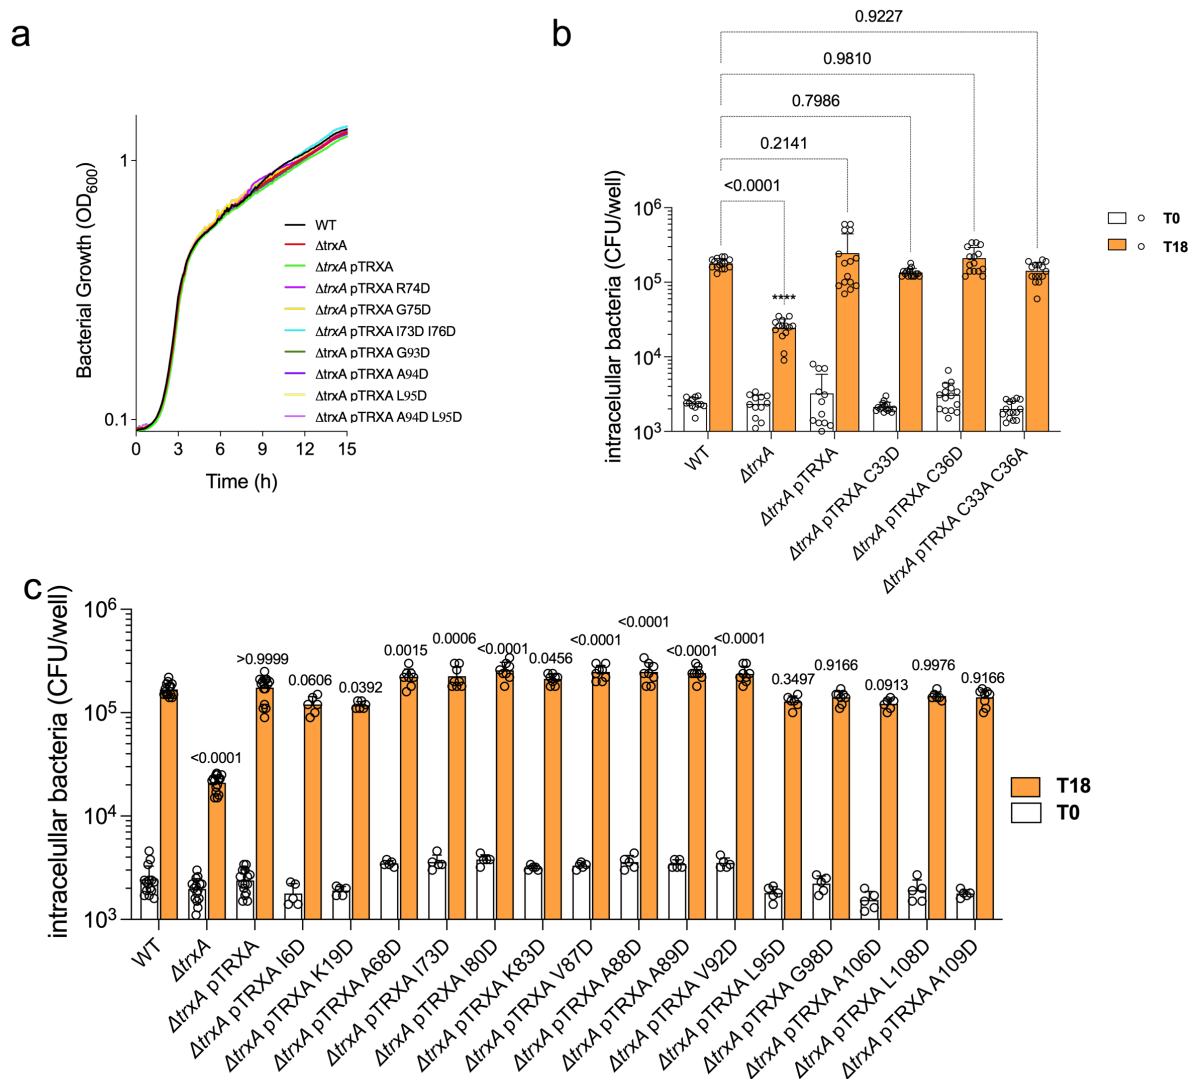

**Fig. S5. Virulence of *Salmonella* strains bearing interfacial mutations in TrxA.** (A) Growth of the indicated *Salmonella* strains was monitored in LB broth by measuring OD<sub>600</sub> over time on a BioTek Synergy H1. Data are the mean ± SD (n = 4) from 2 independent experiments. (B and C) Intracellular replication of *Salmonella* in J774 cells 18 h post-infection was determined by CFU measurement. The number of intracellular bacteria is displayed at 0 (white column) and 18 (orange column) hours after infection. The data are the mean ± SD (B, T0, n = 12, 12, 12, 15, 15, 15; T18, n = 15, 14, 15, 15, 15, 15) (C, T0, n = 15, 15, 15, 5, 5, 5, 5, 5, 5, 5, 5, 5, 5, 5, 5, 5; T18, n = 15, 15, 15, 6, 6, 8, 8, 8, 8, 8, 8, 8, 8, 6, 8, 6, 6, 8) from 2-8 independent experiments. \*\*\*\*,  $p < 0.0001$  as determined by two-way ANOVA. ns, not significant when compared to the 18 h time point of J774 cells infected with WT controls. Source data are provided as a Source Data file.

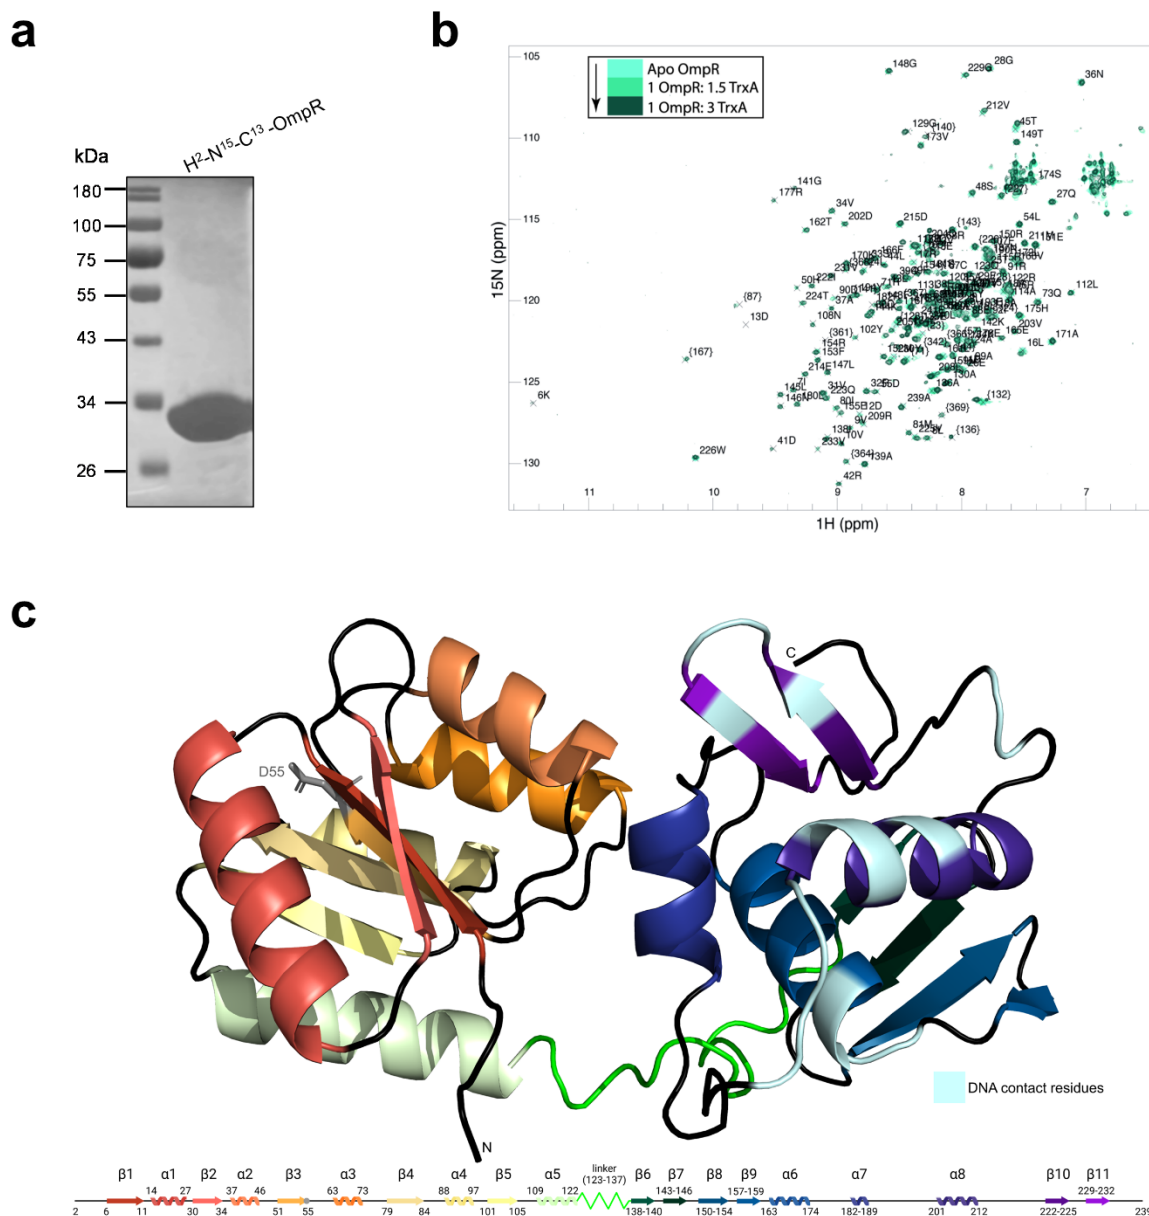

**Fig. S6. Identification of residues in OmpR that mediate productive interactions with TrxA.** (A) Recombinant OmpR was evaluated by SDS-PAGE gels and visualized by Coomassie Brilliant Blue staining. The gels are representative of 2 independent experiments. (B)  $^{15}\text{N}$ -HSQC spectra of apo OmpR (cyan) with increasing amounts of TrxA (dark green). (C) An Alpha-Fold representation of OmpR (<https://alphafold.ebi.ac.uk/entry/P0AA19>) colored by secondary structure with the DNA-binding residues highlighted in cyan, as determined by a 5.0 Å cutoff between DNA and the C-terminal domain of OmpR seen in PDB 6LXN (<https://www.rcsb.org/structure/6lxn>) (4). Source data are provided as a Source Data file.

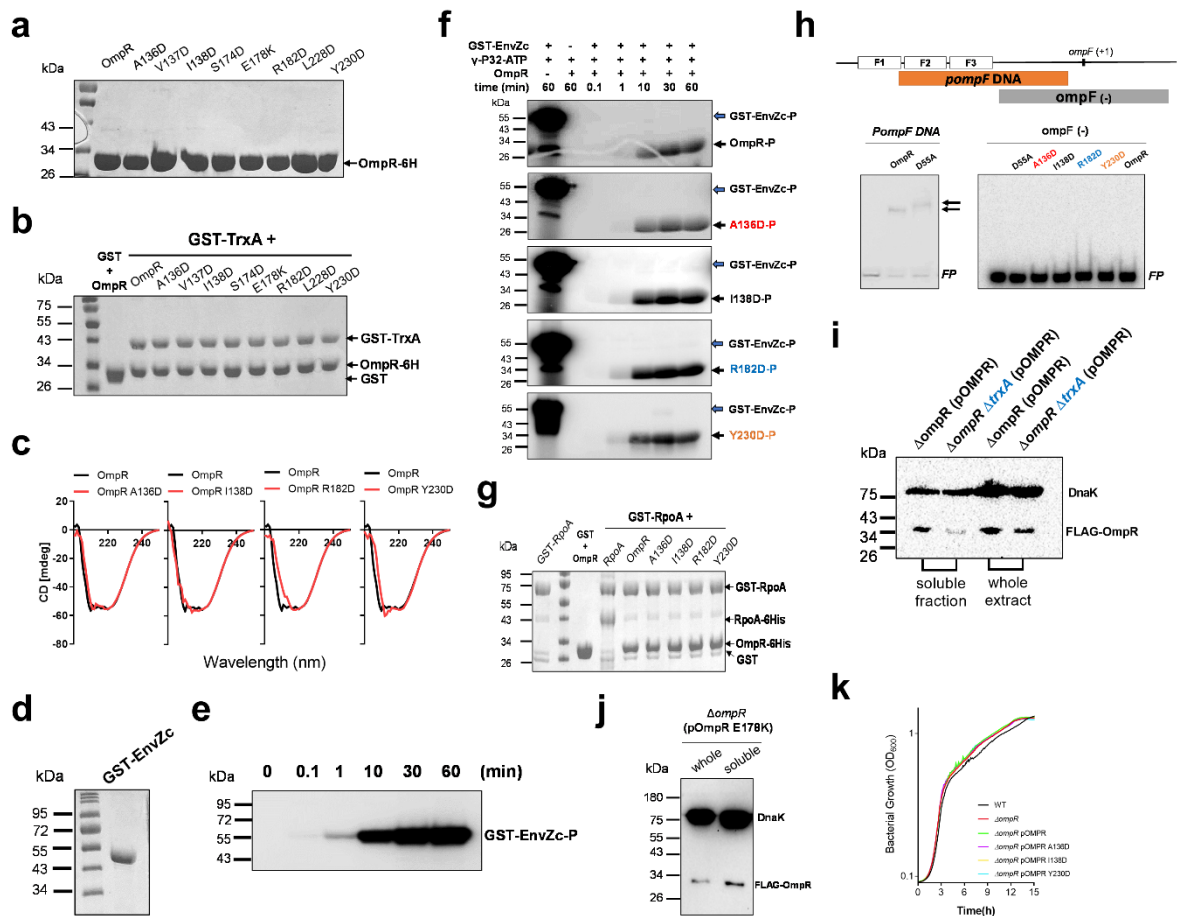

**Fig. S7. Functional characterization of OmpR interfacial residues.** (A and D) Purified recombinant proteins were assessed by SDS-PAGE gels and visualized by Imperial Coomassie Brilliant Blue staining. The gels are representative of 3 independent experiments. (B and G) Input proteins used in the biochemical pull-down assays were evaluated by 12% SDS PAGE gels and visualized by Imperial Coomassie Brilliant Blue staining. The gels are representative of 2 independent experiments. (C) The secondary structure of OmpR proteins was evaluated by CD spectroscopy. Each spectrum is the average of 3 independent scans from 2 independent experiments. (E) Autophosphorylation of a recombinant GST-EnvZc fragment containing residues 223-450 comprising the cytoplasmic domain of the sensor kinase EnvZ. The time-course autophosphorylation of the GST-EnvZc protein was performed in the presence of [ $\gamma$ - $^{32}$ P]ATP, and the reaction products (10  $\mu$ g of GST-EnvZc per lane) overtime were analyzed by a phosphorimager after separation in 10% SDS-PAGE gels. The data are representative of 3 independent experiments. (F) The time-course *in vitro* phosphorylation of recombinant OmpR variants was performed in the presence of GST-EnvZc protein prepared as in panel E. Samples were collected at the indicated times and analyzed by electrophoresis and autoradiography. The data are presentative from 3 independent experiments. (H) The top panel shows a map of the *ompF* locus showing the locations of OmpR binding sites (white boxes), as well as positive (orange box) and negative (gray box) probes used in the electrophoretic mobility shift assays. Binding of OmpR WT and D55A to the positive probe encompassing the *PompF* DNA was evaluated by electrophoretic mobility shift assays (EMSA, left panel). Representative EMSA performed with a nonspecific 80-bp DNA fragment mapping to the upstream DNA region of the *ompF* promoter was also performed (right panel). The blot is representative of 3 independent experiments. (I and J) OmpR and OmpR variants in whole-cell and soluble cytoplasmic extracts obtained from

*ΔompR* or *ΔtrxA ΔompR* *Salmonella* were visualized by immunoblots using anti-FLAG antibodies. DnaK protein was probed as an internal control. The blot is representative of 3 independent experiments. (K) Growth of the indicated *Salmonella* strains was measured in LB broth for 15 h at 37°C by monitoring OD<sub>600</sub> over time on a BioTek Synergy H1. Data are the mean ± SD (n = 4) from 2 independent experiments. Source data are provided as a Source Data file.

## Supplementary Tables

Table S1. TrxA partner molecules identified by mass spectrometric analysis.

|                            |                                                                       |
|----------------------------|-----------------------------------------------------------------------|
| Antioxidant defense        | Thioredoxin reductase (35 kDa)                                        |
|                            | Alkyl hydroperoxide reductase (21 kDa)                                |
|                            | Methionine sulfoxide reductase MsrA (23 kDa)                          |
| Chaperones and translation | 50S ribosomal protein L1                                              |
|                            | 60 kDa chaperon (57 kDa)                                              |
|                            | DnaJ (40 kDa)                                                         |
|                            | DnaK (69 kDa)                                                         |
|                            | Cobalt-precorrin 2 C-methyltransferase (26 kDa)                       |
|                            | FKBP-type peptidyl prolyl cis-trans isomerase SlyD (21 kDa)           |
|                            | Transcription termination protein NusG (21 kDa)                       |
|                            | Transcriptional termination factor Rho (47 kDa)                       |
|                            | Trigger factor (48 kDa)                                               |
|                            | tRNA modifying protein YfgZ (36 kDa)                                  |
| Metabolism                 | Acetyl CoA carboxylase carboxyl transferase subunit a (35 kDa)        |
|                            | Acetyl CoA carboxylase carboxyl transferase subunit b (33 kDa)        |
|                            | Acetyl CoA reductase (26 kDa)                                         |
|                            | Acetyl-coenzyme A carboxylase carboxyl transferase subunit a (35 kDa) |
|                            | Acetyl-coenzyme A carboxylase carboxyl transferase subunit b (33 kDa) |
|                            | ADP-L-glycerol-D-manno-heptose-6-epimerase (35 kDa)                   |
|                            | Anaerobic dimethyl sulfoxide reductase (23 kDa)                       |
|                            | Bisphosphate nucleotase CycQ (27 kDa)                                 |
|                            | Fe/S biogenesis protein NfuA (21 kDa)                                 |

|                       |                                                                                                   |
|-----------------------|---------------------------------------------------------------------------------------------------|
|                       | Fructose-1,6,-biophosphatase class I (37 kDa)                                                     |
|                       | Fumarate hydratase class I (64 kDa)                                                               |
|                       | Fumarate reductase iron-sulfur subunit (27 kDa)                                                   |
|                       | Glyceraldehyde -3-phosphate dehydrogenase (36 kDa)                                                |
|                       | GTP binding protein EngB (24 kDa)                                                                 |
|                       | Malate dehydrogenase (32 kDa)                                                                     |
|                       | Outer membrane protein A OmpA (37 kDa)                                                            |
|                       | Outer membrane protein D OmpD (40 kDa)                                                            |
|                       | Outer membrane protein F OmpF (39 kDa)                                                            |
|                       | PhoH like protein (39 kDa),                                                                       |
|                       | Phosphoadenosine phosphosulfate reductase (28 kDa)                                                |
|                       | Pyrroline-5-carboxylate reductase (28 kDa)                                                        |
|                       | Riboflavin synthase (23 kDa)                                                                      |
|                       | Ribose-phosphate pyrophosphokinase (34 kDa)                                                       |
|                       | Succinate dehydrogenase iron-sulfur subunit (27 kDa)                                              |
|                       | Thiosulfate reductase electron transport protein PhsB (21 kDa)                                    |
|                       | UDP-3-O-glucosamin N-acyltransferase (36 kDa)                                                     |
|                       | Uridine phosphorylase (27 kDa)                                                                    |
| Transcription factors | cAMP activated global transcriptional regulator CRP (24 kDa)                                      |
|                       | Catabolite repressor/activator (38 kDa), encoded by genes <i>cra</i> (also known as <i>fruR</i> ) |
|                       | HTH (helix-turn-helix)-type transcriptional regulator AIIR (29 kDa)                               |
|                       | HTH-type transcriptional regulator CysB (36 kDa)                                                  |
|                       | HTH-type transcriptional regulator UlaR (27 kDa), encoded by the <i>yjfQ</i> gene                 |
|                       | HTH-type transcriptional repressor FabR (24 kDa)                                                  |
|                       | HTH-type transcriptional regulator GalS (39 kDa)                                                  |
|                       | HTH-type transcriptional regulator GntR (36 kDa)                                                  |

|  |                                                |
|--|------------------------------------------------|
|  | Pyruvate dehydrogenase repressor PdhR (29 kDa) |
|  | Response regulator OmpR (27 kDa)               |
|  | Response regulator PhoP (26 kDa)               |
|  | Transcriptional regulator LsrR (34 kDa)        |

Table S2. Bacteria used in this study.

| Strains           | Relevant characteristics                                                                                                                                                                                           | Reference  |
|-------------------|--------------------------------------------------------------------------------------------------------------------------------------------------------------------------------------------------------------------|------------|
| <b>Salmonella</b> |                                                                                                                                                                                                                    |            |
| 14028s            | wild type of <i>S. enterica</i> serovar <i>Typhimurium</i>                                                                                                                                                         | ATCC       |
| AV19007           | $\Delta ompR envZ::Km$ [ $\Delta ompR$ ]                                                                                                                                                                           | This study |
| AV19021           | $\Delta ompR envZ::Km$ (pFLAG::OMPR-ENVZ [pOMPR])                                                                                                                                                                  | This study |
| AV21093           | $\Delta ompR envZ::Km$ (pFLAG::OMPR A136D-ENVZ [pOMPR A136D])                                                                                                                                                      | This study |
| AV21095           | $\Delta ompR envZ::Km$ (pFLAG::OMPR I138D-ENVZ [pOMPR I138D])                                                                                                                                                      | This study |
| AV21096           | $\Delta ompR envZ::Km$ (pFLAG::OMPR E178K-ENVZ [pOMPR E178K])                                                                                                                                                      | This study |
| AV21097           | $\Delta ompR envZ::Km$ (pFLAG::OMPR R182D-ENVZ [pOMPR R182D])                                                                                                                                                      | This study |
| AV21098           | $\Delta ompR envZ::Km$ (pFLAG::OMPR Y230D-ENVZ [pOMPR Y230D])                                                                                                                                                      | This study |
| AV09137           | $\Delta trxA::FRT$                                                                                                                                                                                                 | (5)        |
| AV20119           | $\Delta trxA::FRT$ (pWSK29::TAP)                                                                                                                                                                                   | This study |
| AV10195           | $\Delta trxA::FRT$ (pWSK29:: <i>trxA</i> ::TAP)                                                                                                                                                                    | (5)        |
| AV18058           | $\Delta trxA::FRT$ (pTRXA::FLAG)                                                                                                                                                                                   | This study |
| AV18061           | $\Delta trxA::FRT$ (pTRXA::FLAG R74D)                                                                                                                                                                              | This study |
| AV19196           | $\Delta trxA::FRT$ (pTRXA::FLAG G75D)                                                                                                                                                                              | This study |
| AV20057           | $\Delta trxA::FRT$ (pTRXA::FLAG I73D I76D)                                                                                                                                                                         | This study |
| AV19197           | $\Delta trxA::FRT$ (pTRXA::FLAG G93D)                                                                                                                                                                              | This study |
| AV18112           | $\Delta trxA::FRT$ (pTRXA::FLAG A94D)                                                                                                                                                                              | This study |
| AV18078           | $\Delta trxA::FRT$ (pTRXA::FLAG L95D)                                                                                                                                                                              | This study |
| AV21154           | $\Delta trxA::FRT$ (pTRXA::FLAG A94D L95D)                                                                                                                                                                         | This study |
| AV19027           | $\Delta trxA::FRT$ , $\Delta ompR envZ::Km$                                                                                                                                                                        | This study |
| AV19033           | $\Delta trxA::FRT$ , $\Delta ompR envZ::Km$ (pFLAG::OMPR-ENVZ)                                                                                                                                                     | This study |
| AV22055           | FLAG:: <i>ompR envZ</i> ::Cm                                                                                                                                                                                       | This study |
| AV22053           | <i>trxA</i> ::6His::Km                                                                                                                                                                                             | This study |
| AV22070           | FLAG:: <i>ompR envZ</i> ::Cm, <i>trxA</i> ::6His::Km                                                                                                                                                               | This study |
| <b>E.coli</b>     |                                                                                                                                                                                                                    |            |
| DH5 $\alpha$      | <i>supE44</i> $\Delta lacU169$ ( $\phi 80 lacZ \Delta M15$ ) <i>hsdR17 recA1 endA1 gyrA96 thi-1 relA1</i>                                                                                                          | (6)        |
| BTH101            | F- <i>cya-99 araD139 galE15 galK16 rpsL1</i> (Str <sup>r</sup> ) <i>hsdR2 mcrA1 mcrB1</i>                                                                                                                          | Euromedex  |
| BL21(DE3)         | F <sup>-</sup> <i>ompT hsdS<sub>B</sub>(r<sub>B</sub><sup>-</sup> m<sub>B</sub><sup>-</sup>) gal dcm</i> (DE3)                                                                                                     | Invitrogen |
| OrigamiB(DE3)     | F <sup>-</sup> <i>ompT hsdS<sub>B</sub>(r<sub>B</sub><sup>-</sup> m<sub>B</sub><sup>-</sup>) gal dcm lacY1 ahpC</i> (DE3) <i>gor522::Tn10 trxB pLysS</i> (Cam <sup>R</sup> , Kan <sup>R</sup> , Tet <sup>R</sup> ) | Novagen    |
| AV16097           | BTH101 (pKNT25:: <i>fruR</i> , pUT18:: <i>trxA</i> )                                                                                                                                                               | This study |
| AV16108           | BTH101 (pKNT25:: <i>fruR</i> , pUT18:: <i>trxA</i> C33A C36A)                                                                                                                                                      | This study |
| AV16096           | BTH101 (pKNT25:: <i>galS</i> , pUT18:: <i>trxA</i> )                                                                                                                                                               | This study |
| AV16107           | BTH101 (pKNT25:: <i>galS</i> , pUT18:: <i>trxA</i> C33A C36A)                                                                                                                                                      | This study |
| AV16098           | BTH101 (pKNT25:: <i>gntR</i> , pUT18:: <i>trxA</i> )                                                                                                                                                               | This study |
| AV16109           | BTH101 (pKNT25:: <i>gntR</i> , pUT18:: <i>trxA</i> C33A C36A)                                                                                                                                                      | This study |
| AV16090           | BTH101 (pKNT25:: <i>ompR</i> , pUT18:: <i>trxA</i> )                                                                                                                                                               | This study |
| AV16104           | BTH101 (pKNT25:: <i>ompR</i> , pUT18:: <i>trxA</i> C33A C36A)                                                                                                                                                      | This study |
| AV16112           | BTH101 (pKNT25:: <i>phoP</i> , pUT18:: <i>trxA</i> )                                                                                                                                                               | This study |
| AV16115           | BTH101 (pKNT25:: <i>phoP</i> , pUT18:: <i>trxA</i> C33A C36A)                                                                                                                                                      | This study |
| AV21152           | BTH101 (pKNT25:: <i>pdhR</i> , pUT18:: <i>trxA</i> )                                                                                                                                                               | This study |
| AV21153           | BTH101 (pKNT25:: <i>pdhR</i> , pUT18:: <i>trxA</i> C33A C36A)                                                                                                                                                      | This study |
| AV12160           | BTH101 (pKNT25:: <i>ssrB</i> , pUT18:: <i>trxA</i> )                                                                                                                                                               | (5)        |

|         |                                                               |            |
|---------|---------------------------------------------------------------|------------|
| AV12156 | BTH101 (pKNT25:: <i>ssrB</i> , pUT18:: <i>trxA</i> C33A C36A) | (5)        |
| AV16091 | BTH101 (pKNT25:: <i>yjfQ</i> , pUT18:: <i>trxA</i> )          | This study |
| AV16105 | BTH101 (pKNT25:: <i>yjfQ</i> , pUT18:: <i>trxA</i> C33A C36A) | This study |
| AV19178 | BTH101 (pKT25, pUT18C:: <i>trxA</i> )                         | This study |
| AV20117 | BTH101 (pKT25:: <i>ompR</i> , pUT18C)                         | This study |
| AV19183 | BTH101 (pKT25:: <i>ompR</i> , pUT18C:: <i>trxA</i> )          | This study |
| AV19216 | BTH101 (pKT25:: <i>ompR</i> , pUT18C:: <i>trxA</i> R74D)      | This study |
| AV19217 | BTH101 (pKT25:: <i>ompR</i> , pUT18C:: <i>trxA</i> G75D)      | This study |
| AV19218 | BTH101 (pKT25:: <i>ompR</i> , pUT18C:: <i>trxA</i> G93D)      | This study |
| AV19219 | BTH101 (pKT25:: <i>ompR</i> , pUT18C:: <i>trxA</i> A94D L95D) | This study |
| AV20118 | BTH101 (pKT25:: <i>phoP</i> , pUT18C)                         | This study |
| AV19184 | BTH101 (pKT25:: <i>phoP</i> , pUT18C:: <i>trxA</i> )          | This study |
| AV19222 | BTH101 (pKT25:: <i>phoP</i> , pUT18C:: <i>trxA</i> R74D)      | This study |
| AV19223 | BTH101 (pKT25:: <i>phoP</i> , pUT18C:: <i>trxA</i> G75D)      | This study |
| AV19224 | BTH101 (pKT25:: <i>phoP</i> , pUT18C:: <i>trxA</i> G93D)      | This study |
| AV19225 | BTH101 (pKT25:: <i>phoP</i> , pUT18C:: <i>trxA</i> A94D L95D) | This study |
| AV19182 | BTH101 (pKT25:: <i>ssrB</i> , pUT18C)                         | This study |
| AV19179 | BTH101 (pKT25:: <i>ssrB</i> , pUT18C:: <i>trxA</i> )          | This study |
| AV19213 | BTH101 (pKT25:: <i>ssrB</i> , pUT18C:: <i>trxA</i> R74D)      | This study |
| AV19199 | BTH101 (pKT25:: <i>ssrB</i> , pUT18C:: <i>trxA</i> G75D)      | This study |
| AV19200 | BTH101 (pKT25:: <i>ssrB</i> , pUT18C:: <i>trxA</i> G93D)      | This study |
| AV19201 | BTH101 (pKT25:: <i>ssrB</i> , pUT18C:: <i>trxA</i> A94D L95D) | This study |
| AV21123 | BTH101 (pKT25:: <i>ompR</i> A136D, pUT18C:: <i>trxA</i> )     | This study |
| AV21124 | BTH101 (pKT25:: <i>ompR</i> I138D, pUT18C:: <i>trxA</i> )     | This study |
| AV21125 | BTH101 (pKT25:: <i>ompR</i> R182D, pUT18C:: <i>trxA</i> )     | This study |
| AV21126 | BTH101 (pKT25:: <i>ompR</i> Y230D, pUT18C:: <i>trxA</i> )     | This study |
| AV15104 | BTH101 (pKT25:: <i>rpoA</i> , pUT18C:: <i>trxA</i> )          | This study |
| AV15128 | BTH101 (pKT25:: <i>rpoA</i> , pUT18C:: <i>trxA</i> C33A C36A) | This study |
| AV21066 | BL21(DE3) (pET22b:: <i>OmpR</i> A136D)                        | This study |
| AV21067 | BL21(DE3) (pET22b:: <i>OmpR</i> V137D)                        | This study |
| AV21071 | BL21(DE3) (pET22b:: <i>OmpR</i> I138D)                        | This study |
| AV21068 | BL21(DE3) (pET22b:: <i>OmpR</i> S174D)                        | This study |
| AV21069 | BL21(DE3) (pET22b:: <i>OmpR</i> E178K)                        | This study |
| AV21070 | BL21(DE3) (pET22b:: <i>OmpR</i> R182D)                        | This study |
| AV21076 | BL21(DE3) (pET22b:: <i>OmpR</i> L228D)                        | This study |
| AV20003 | BL21(DE3) (pET22b:: <i>PhoP</i> )                             | This study |
| AV20115 | BL21(DE3) (pET22b:: <i>TrxA</i> )                             | This study |
| AV20116 | BL21(DE3) (pET22b:: <i>TrxA</i> C33A C36A)                    | This study |
| AV22105 | BL21(DE3) (pET22b:: <i>TrxA</i> C33D)                         | This study |
| AV22097 | BL21(DE3) (pET22b:: <i>TrxA</i> C36D)                         | This study |
| AV18136 | BL21(DE3) (pET22b:: <i>TrxA</i> R74D)                         | This study |
| AV19249 | BL21(DE3) (pET22b:: <i>TrxA</i> G75D)                         | This study |
| AV20089 | BL21(DE3) (pET22b:: <i>TrxA</i> I73D I76D)                    | This study |
| AV20021 | BL21(DE3) (pET22b:: <i>TrxA</i> A88D)                         | This study |
| AV19240 | BL21(DE3) (pET22b:: <i>TrxA</i> G93D)                         | This study |
| AV18141 | BL21(DE3) (pET22b:: <i>TrxA</i> A94D L95D)                    | This study |
| AV22127 | BL21(DE3) (pGEX6p:: <i>EnvZc</i> )                            | This study |
| AV16141 | BL21(DE3) (pGEX6p:: <i>FruR</i> )                             | This study |
| AV16140 | BL21(DE3) (pGEX6p:: <i>GalS</i> )                             | This study |
| AV16137 | BL21(DE3) (pGEX6p:: <i>GntR</i> )                             | This study |
| AV19006 | BL21(DE3) (pGEX6p:: <i>NarL</i> )                             | This study |
| AV16138 | BL21(DE3) (pGEX6p:: <i>OmpR</i> )                             | This study |
| AV16155 | BL21(DE3) (pGEX6p:: <i>PhoP</i> )                             | This study |

|         |                                           |            |
|---------|-------------------------------------------|------------|
| AV16139 | BL21(DE3) (pGEX6p::PdhR)                  | This study |
| AV19188 | BL21(DE3) (pGEX6p::SsrB)                  | This study |
| AV07260 | BL21(DE3) (pGEX6p::SsrBc)                 | (7)        |
| AV09166 | BL21(DE3) (pGEX6p::TrxA)                  | This study |
| AV16156 | BL21(DE3) (pGEX6p::YjfQ)                  | This study |
| AV21132 | DH5α (pTim::ompF)                         | This study |
| AV20008 | Origami B(DE3) pLysS (pET22b::OmpR)       | This study |
| AV20012 | Origami B(DE3) pLysS (pET22b::OmpR D55A)  | This study |
| AV21074 | Origami B(DE3) pLysS (pET22b::OmpR Y230D) | This study |
| AV15158 | Origami B(DE3) pLysS (pET22b::RpoA)       | This study |
| AV15152 | Origami B(DE3) pLysS (pGEX6p)             | (8)        |
| AV15155 | Origami B(DE3) pLysS (pGEX6p::RpoA)       | This study |

---

Table S3. Plasmids used in this study.

| Plasmid                | Relevant characteristics                                                        | Source     |
|------------------------|---------------------------------------------------------------------------------|------------|
| pET22b(+)              | <i>ori</i> pBR322, C-terminal 6His-Taq fusion vector, Pn <sup>r</sup>           | Novagen    |
| pET22b::OmpR           | pET-22b(+) + 0.72-kb <i>ompR</i> DNA, Pn <sup>r</sup>                           | This study |
| pET22b::OmpR D55A      | pET-22b(+) + 0.72-kb <i>ompR</i> D55A DNA, Pn <sup>r</sup>                      | This study |
| pET22b::OmpR A136D     | pET-22b(+) + 0.72-kb <i>ompR</i> A136D DNA, Pn <sup>r</sup>                     | This study |
| pET22b::OmpR V137D     | pET-22b(+) + 0.72-kb <i>ompR</i> V137D DNA, Pn <sup>r</sup>                     | This study |
| pET22b::OmpR I138D     | pET-22b(+) + 0.72-kb <i>ompR</i> I138D DNA, Pn <sup>r</sup>                     | This study |
| pET22b::OmpR S174D     | pET-22b(+) + 0.72-kb <i>ompR</i> S174D DNA, Pn <sup>r</sup>                     | This study |
| pET22b::OmpR E178K     | pET-22b(+) + 0.72-kb <i>ompR</i> E178K DNA, Pn <sup>r</sup>                     | This study |
| pET22b::OmpR R182D     | pET-22b(+) + 0.72-kb <i>ompR</i> R182D DNA, Pn <sup>r</sup>                     | This study |
| pET22b::OmpR L228D     | pET-22b(+) + 0.72-kb <i>ompR</i> L228D DNA, Pn <sup>r</sup>                     | This study |
| pET22b::OmpR Y230D     | pET-22b(+) + 0.72-kb <i>ompR</i> Y230D DNA, Pn <sup>r</sup>                     | This study |
| pET22b::PhoP           | pET-22b(+) + 0.67-kb <i>phoP</i> DNA, Pn <sup>r</sup>                           | This study |
| pET22b::RpoA           | pET-22b(+) + 0.99-kb <i>rpoA</i> DNA, Pn <sup>r</sup>                           | This study |
| pET22b::TrxA           | pET-22b(+) + 0.33-kb <i>trxA</i> DNA, Pn <sup>r</sup>                           | (5)        |
| pET22b::TrxA C33A C36A | pET-22b(+) + 0.33-kb <i>trxA</i> C33A C36A DNA, Pn <sup>r</sup>                 | (5)        |
| pET22b::TrxA C33D      | pET-22b(+) + 0.33-kb <i>trxA</i> C33D DNA, Pn <sup>r</sup>                      | This study |
| pET22b::TrxA C36D      | pET-22b(+) + 0.33-kb <i>trxA</i> C36D DNA, Pn <sup>r</sup>                      | This study |
| pET22b::TrxA R74D      | pET-22b(+) + 0.33-kb <i>trxA</i> R74D DNA, Pn <sup>r</sup>                      | This study |
| pET22b::TrxA G75D      | pET-22b(+) + 0.33-kb <i>trxA</i> G75D DNA, Pn <sup>r</sup>                      | This study |
| pET22b::TrxA I73D I76D | pET-22b(+) + 0.33-kb <i>trxA</i> I73D I76D DNA, Pn <sup>r</sup>                 | This study |
| pET22b::TrxA A88D      | pET-22b(+) + 0.33-kb <i>trxA</i> A88D DNA, Pn <sup>r</sup>                      | This study |
| pET22b::TrxA G93D      | pET-22b(+) + 0.33-kb <i>trxA</i> G93D DNA, Pn <sup>r</sup>                      | This study |
| pET22b::TrxA A94D      | pET-22b(+) + 0.33-kb <i>trxA</i> A94D DNA, Pn <sup>r</sup>                      | This study |
| pET22b::TrxA A94D L95D | pET-22b(+) + 0.33-kb <i>trxA</i> A94D L95D DNA, Pn <sup>r</sup>                 | This study |
| pGEX6p                 | GST fusion expression vector, Pn <sup>r</sup>                                   | Cytiva     |
| pGEX6p::EnvZc          | pGEX6p + 0.70-kb <i>EnvZc</i> DNA, Pn <sup>r</sup>                              | This study |
| pGEX6p::FruR           | pGEX6p + 1.00-kb <i>fruR</i> DNA, Pn <sup>r</sup>                               | This study |
| pGEX6p::GalS           | pGEX6p + 1.04-kb <i>galS</i> DNA, Pn <sup>r</sup>                               | This study |
| pGEX6p::GntR           | pGEX6p + 0.91-kb <i>gntR</i> DNA, Pn <sup>r</sup>                               | This study |
| pGEX6p::NarL           | pGEX6p + 0.65-kb <i>narL</i> DNA, Pn <sup>r</sup>                               | This study |
| pGEX6p::OmpR           | pGEX6p + 0.72-kb <i>ompR</i> DNA, Pn <sup>r</sup>                               | This study |
| pGEX6p::PhoP           | pGEX6p + 0.67-kb <i>phoP</i> DNA, Pn <sup>r</sup>                               | This study |
| pGEX6p::PdhR           | pGEX6p + 0.76-kb <i>pdhR</i> DNA, Pn <sup>r</sup>                               | This study |
| pGEX6p::RpoA           | pGEX6p + 0.99-kb <i>rpoA</i> DNA, Pn <sup>r</sup>                               | This study |
| pGEX6p::SsrB           | pGEX6p + 0.64-kb <i>ssrB</i> DNA, Pn <sup>r</sup>                               | This study |
| pGEX6p::SsrBc          | pGEX6p + 0.23-kb C-terminal of <i>ssrB</i> DNA<br>(137-212 aa), Pn <sup>r</sup> | (7)        |

|                        |                                                                                                                   |            |
|------------------------|-------------------------------------------------------------------------------------------------------------------|------------|
| pGEX6p::TrxA           | pGEX6p + 0.33-kb <i>trxA</i> DNA, Pn <sup>r</sup>                                                                 | This study |
| pGEX6p::YjfQ           | pGEX6p + 0.76-kb <i>yjfQ</i> DNA, Pn <sup>r</sup>                                                                 | This study |
| pKD13                  | template vector for FRT-flanked Km <sup>r</sup> cassette, Km <sup>r</sup> Pn <sup>r</sup>                         | (9)        |
| pKNT25                 | pSU40 with the N-terminal T25 domain of CyaA, Km <sup>r</sup>                                                     | Euromedex  |
| pKT25                  | pSU40 with the C-terminal T25 domain of CyaA, Km <sup>r</sup>                                                     | Euromedex  |
| pKNT25::FruR           | pKT25 plasmid with <i>cyaAT25-fruR</i> fusion, Km <sup>r</sup>                                                    | This study |
| pKNT25::GalS           | pKT25 plasmid with <i>cyaAT25-galS</i> fusion, Km <sup>r</sup>                                                    | This study |
| pKNT25::GntR           | pKT25 plasmid with <i>cyaAT25-gntR</i> fusion, Km <sup>r</sup>                                                    | This study |
| pKNT25::OmpR           | pKT25 plasmid with <i>cyaAT25-ompR</i> fusion, Km <sup>r</sup>                                                    | This study |
| pKNT25::PhoP           | pKT25 plasmid with <i>cyaAT25-phoP</i> fusion, Km <sup>r</sup>                                                    | This study |
| pKNT25::PdhR           | pKT25 plasmid with <i>cyaAT25-pdhR</i> fusion, Km <sup>r</sup>                                                    | This study |
| pKNT25::SsrB           | pKT25 plasmid with <i>cyaAT25-ssrB</i> fusion, Km <sup>r</sup>                                                    | (5)        |
| pKNT25::YjfQ           | pKT25 plasmid with <i>cyaAT25-yjfQ</i> fusion, Km <sup>r</sup>                                                    | This study |
| pKT25::OmpR            | pKT25 plasmid with <i>ompR-cyaAT25</i> fusion, Km <sup>r</sup>                                                    | This study |
| pKT25::PhoP            | pKT25 plasmid with <i>phoP-cyaAT25</i> fusion, Km <sup>r</sup>                                                    | This study |
| pKT25::SsrB            | pKT25 plasmid with <i>ssrB-cyaAT25</i> fusion, Km <sup>r</sup>                                                    | This study |
| pKT25::RpoA            | pKT25 plasmid with <i>rpoA-cyaAT25</i> fusion, Km <sup>r</sup>                                                    | This study |
| pTIM                   | <i>in vitro</i> transcription backbone plasmid,<br>bla <i>rmB</i> & <i>rpoC</i> term pBluescript, Pn <sup>r</sup> | (10)       |
| pTIM::ompF             | pTim + 1.3-kb <i>pompF</i> and <i>ompF</i> DNA, Pn <sup>r</sup>                                                   | This study |
| pUT18                  | pUC19 with the N-terminal T18 domain of CyaA, Pn <sup>r</sup>                                                     | Euromedex  |
| pUT18C                 | pUC19 with the C-terminal T18 domain of CyaA, Pn <sup>r</sup>                                                     | Euromedex  |
| pUT18::trxA            | pUT18 plasmid with <i>cyaAT18-trxA</i> fusion, Pn <sup>r</sup>                                                    | (5)        |
| pUT18::trxA C33A C36A  | pUT18 plasmid with <i>cyaAT18-trxA</i> C33A C36A fusion,<br>Pn <sup>r</sup>                                       | (5)        |
| pUT18C::trxA           | pUT18 plasmid with <i>trxA-cyaAT18</i> fusion, Pn <sup>r</sup>                                                    | This study |
| pUT18C::trxA C33A C36A | pUT18 plasmid with <i>trxA</i> C33A C36A- <i>cyaAT18</i> fusion,<br>Pn <sup>r</sup>                               | This study |
| pUT18C::trxA R74D      | pUT18 plasmid with <i>trxA</i> R74D- <i>cyaAT18</i> fusion, Pn <sup>r</sup>                                       | This study |
| pUT18C::trxA G75D      | pUT18 plasmid with <i>trxA</i> G75D- <i>cyaAT18</i> fusion, Pn <sup>r</sup>                                       | This study |
| pUT18C::trxA G93D      | pUT18 plasmid with <i>trxA</i> G93D- <i>cyaAT18</i> fusion, Pn <sup>r</sup>                                       | This study |
| pUT18C::trxA A94D L95D | pUT18 plasmid with <i>trxA</i> A94D L95D- <i>cyaAT18</i> fusion,<br>Pn <sup>r</sup>                               | This study |
| pWSK29                 | low copy plasmid, <i>lacZα</i> , Pn <sup>r</sup>                                                                  | (11)       |
| pWSK29::TAP            | pWSK29 + 0.42-kb TAP DNA, Pn <sup>r</sup>                                                                         | (5)        |
| pWSK29::trxA::TAP      | pWSK29 + 0.90-kb <i>ptrxA</i> , <i>trxA</i> , and TAP DNA, Pn <sup>r</sup>                                        | (5)        |
| pFLAG::OMPRA136D ENVZ  | pWSK29 + 2.3-kb <i>pompR::FLAG::ompR envZ</i> DNA, Pn <sup>r</sup>                                                | This study |
| pFLAG::OMPRA136D ENVZ  | pWSK29 + 2.3-kb <i>pompR::FLAG::ompRA136D envZ</i><br>DNA, Pn <sup>r</sup>                                        | This study |

|                       |                                                                                      |            |
|-----------------------|--------------------------------------------------------------------------------------|------------|
| pFLAG::OMPRI138D ENVZ | pWSK29 + 2.3-kb <i>pompR</i> ::FLAG::ompRI138D envZ<br>DNA, Pn <sup>r</sup>          | This study |
| pFLAG::OMPRI178K ENVZ | pWSK29 + 2.3-kb <i>pompR</i> ::FLAG::ompRIE178K envZ<br>DNA, Pn <sup>r</sup>         | This study |
| pFLAG::OMPRI182D ENVZ | pWSK29 + 2.3-kb <i>pompR</i> ::FLAG::ompRR182D envZ<br>DNA, Pn <sup>r</sup>          | This study |
| pFLAG::OMPRI230D ENVZ | pWSK29 + 2.3-kb <i>pompR</i> ::FLAG::ompRY230D envZ<br>DNA, Pn <sup>r</sup>          | This study |
| pTRXA::FLAG           | pWSK29 + 0.51-kb <i>ptrxA</i> :: <i>trxA</i> ::FLAG DNA, Pn <sup>r</sup>             | This study |
| pTRXA R74D::FLAG      | pWSK29 + 0.51-kb <i>ptrxA</i> :: <i>trxA</i> R74D::FLAG DNA, Pn <sup>r</sup>         | This study |
| pTRXA G75D::FLAG      | pWSK29 + 0.51-kb <i>ptrxA</i> :: <i>trxA</i> G75D::FLAG DNA, Pn <sup>r</sup>         | This study |
| pTRXA I73D I76D::FLAG | pWSK29 + 0.51-kb <i>ptrxA</i> :: <i>trxA</i> I73D I76D::FLAG<br>DNA, Pn <sup>r</sup> | This study |
| pTRXA G93D::FLAG      | pWSK29 + 0.51-kb <i>ptrxA</i> :: <i>trxA</i> G93D::FLAG DNA, Pn <sup>r</sup>         | This study |
| pTRXA A94D::FLAG      | pWSK29 + 0.51-kb <i>ptrxA</i> :: <i>trxA</i> A94D::FLAG DNA, Pn <sup>r</sup>         | This study |
| pTRXA L95D::FLAG      | pWSK29 + 0.51-kb <i>ptrxA</i> :: <i>trxA</i> L95D::FLAG DNA, Pn <sup>r</sup>         | This study |
| pTRXA A94D L95D::FLAG | pWSK29 + 0.51-kb <i>ptrxA</i> :: <i>trxA</i> A94D L95D::FLAG<br>DNA, Pn <sup>r</sup> | This study |

---

**Table S4. Oligonucleotides used in this study.**

| Strains               | Primer Sequence (5' → 3')                                                                      |
|-----------------------|------------------------------------------------------------------------------------------------|
| <i>ΔompR envZ::Km</i> | <b>F:</b><br>ATAAGATTCTGGTGGTTGATGACGATATGCGTCTGCGGGTGT<br>AGGCTGGAGCTGCTTCG                   |
|                       | <b>R:</b> ACGCGAGCCACAGGAACCGGTAGCCAGGCGCGAATCGACA<br>ATTCCGGGGATCCGTCGAC                      |
| <hr/>                 |                                                                                                |
| Plasmid               |                                                                                                |
| pET22b:: <i>OmpR</i>  | <b>F:</b> ATCGCATATGCAAGAGAATTATAAGATTC<br><b>R:</b> ATCGCTCGAGTGCTTTAGAACCGTCCG               |
| pET22b:: <i>PhoP</i>  | <b>F:</b> ATCGCATATGCGCGTACTGGTTGTAGAGGA<br><b>R:</b> ATCGCTCGAGGCGCAATTCAAAAAGATATC           |
| pET22b:: <i>RpoA</i>  | <b>F:</b> CATATGCAGGGTTCTGTGACAGAGTTTCTA<br><b>R:</b> CTCGAGCTCGTCAGCGATGCTTGCC                |
| pGEX6p:: <i>EnvZc</i> | <b>F:</b> ATCGGGATCCGCAGCCGGCGTGAAGCAATT<br><b>R:</b> ATCGCTCGAGTTATGCCTCTTTTGTCTGCC           |
| pGEX6p:: <i>FruR</i>  | <b>F:</b> CGCGGATCCAAACTGGATGAAATCGCTCG<br><b>R:</b> CCGCTCGAGTTAGCTACGGCTCAGAATGCC            |
| pGEX6p:: <i>GalS</i>  | <b>F:</b> CGCGGATCCATCACCATTCGTGATGTAGC<br><b>R:</b> CCGCTCGAGTCAGTTAGTGATCAGTACCGCATT         |
| pGEX6p:: <i>GntR</i>  | <b>F:</b> CGCGGATCCATGAAAAGAAAAGACCCGTACTTCAG<br><b>R:</b> CCGCTCGAGCTA AATAGATCCGCCCGGTG      |
| pGEX6p:: <i>NarL</i>  | <b>F:</b> ATCGGGATCCAATAATCAGGAACCGGCAACC<br><b>R:</b> ATCGCTCGAGTTAAAAGATGCGTTCCTGATGTAC      |
| pGEX6p:: <i>OmpR</i>  | <b>F:</b> CGCGGATCCATGCAAGAGAATTATAAGATTCTGGTGG<br><b>R:</b> CCGCTCGAGTCATGCTTTAGAACCGTCCGGTAC |
| pGEX6p:: <i>PhoP</i>  | <b>F:</b> CGCGGATCCATGATGCGCGTACTGGTTGTAG<br><b>R:</b> CCGCTCGAGTTAGCGCAATTCAAAAAGATATCCTTGTC  |
| pGEX6p:: <i>PdhR</i>  | <b>F:</b> CGCGGATCCATGGCCTACAGCAAATCCG<br><b>R:</b> CCGCTCGAGCTAATTCTTGCGCTGTTCCAGGC           |
| pGEX6p:: <i>RpoA</i>  | <b>F:</b> GGATCCCAGGGTTCTGTGACAGAGTTTCTAA<br><b>R:</b> CTCGAGCTCGTCAGCGATGCTTGCC               |
| pGEX6p:: <i>SsrB</i>  | <b>F:</b> GGATCCAAAGAATATAAGATCTTATTAG<br><b>R:</b> GAATTCCATACTCTATTAACCTCATT                 |
| pGEX6p:: <i>YjfQ</i>  | <b>F:</b> CGCGGATCCATGACTGAAGCACAAAGACATCAA<br><b>R:</b> CCGCTCGAGTTAAACGCGGAGTATGCTTACACC     |
| pKNT25:: <i>FruR</i>  | <b>F:</b> AACTGCAGGTGAAACTGGATGAAATCGCTCG<br><b>R:</b> CGGAATTCTTAGCTACGGCTCAGAATGCC           |
| pKNT25:: <i>GalS</i>  | <b>F:</b> AACTGCAGATGATCACCATTCGTGATGTAGC<br><b>R:</b> CGGAATTCTCAGTTAGTGATCAGTACCGCATT        |
| pKNT25:: <i>GntR</i>  | <b>F:</b> AACTGCAGATGAAAAGAAAAGACCCGTACTTCAG<br><b>R:</b> CGGAATTCCTA AATAGATCCGCCCGGTG        |

|                     |                                                                                                                                                                     |
|---------------------|---------------------------------------------------------------------------------------------------------------------------------------------------------------------|
| pKNT25::OmpR        | F: AACTGCAGATGCAAGAGAATTATAAGATTCTGGTGG<br>R: CGGAATTCTCATGCTTTAGAACCGTCCGGTAC                                                                                      |
| pKNT25::PhoP        | F: AACTGCAGATGATGCGCGTACTGGTTGTAG<br>R: CGGAATTCTTAGCGCAATTCAAAAAGATATCCTTGTC                                                                                       |
| pKNT25::PdhR        | F: AACTGCAGATGGCCTACAGCAAATCCG<br>R: CGGAATTCCTAATTCTTGCGCTGTTCCAGGC                                                                                                |
| pKNT25::YjfQ        | F: AACTGCAGATGACTGAAGCACAAAGACATCAA<br>R: CGGAATTCTTAAACGCGGAGTATGCTTACACC                                                                                          |
| pKT25::OmpR         | F: ATCGTCTAGATCAAGAGAATTATAAGATTCT<br>R: ATCGGAATTCTCATGCTTTAGAACCGTCCGG                                                                                            |
| pKT25::PhoP         | F: ATCGTCTAGATCGCGTACTGGTTGTAGAGGAT<br>R: ATCGGAATTCTTAGCGCAATTCAAAAAGATATC                                                                                         |
| pKT25::SsrB         | F: ATCGTCTAGATAAAGAATATAAGATCTTATTA<br>R: ATCGGAATTCTTAATACTCTATTAACCTC                                                                                             |
| pKT25::RpoA         | F: TCTAGAGGGTTCTGTGACAGAGTTTCT<br>R: GGATCCTCGTCAGCGATGCTTGCCGG                                                                                                     |
| pTim::ompF          | F: ATCGGAATTCTATTATTTCTTTTCAAACCAAATCT<br>R: ATCGCTGCAGAAACAAAGGGGTCTGCTGA                                                                                          |
| pUT18C::trxA        | F: TCTAGAGAGCGATAAAATTATTCACCTG<br>R: GAGCTCGCCAGATTGGCGTCGAGAAAC                                                                                                   |
| pFLAG::OMPR ENVZ    |                                                                                                                                                                     |
| 1. ompR envZ PCR    | F: ATCGAAGCTTACCTTTGCTGTGCGATATTGCGC<br>R: ATCGTCTAGATTATGCCTCTTTTGTGCGTCCCCTGGAC                                                                                   |
| 2. FLAG insert PCR  | F: GAGTACAGACAATG <b>GACTACA</b> AAGACGATGACGACAAGCA<br>AGAGAATTATAAGATTCTGG<br>R: CCAGAATCTTATAATTCTCTTG <b>CTTGTCGTCATCGTCTTTGT</b><br><b>AGTCC</b> ATTGTCTGTACTC |
| pTRXA::FLAG         | F: CCGCTCGAGCGAAGTCGGA AAACCTTCTGT TCTGTAAATG<br>R: CGCGGATCCTT <b>ACTTGTCGTCATCGTCTTTGTAGTCCGCCA</b><br>GATTGGCGTCGAGAAACT                                         |
| FLAG::ompR envZ::Cm | F1: ATCGGGATCCGAAAGGGAGGTATTACCCT<br>R1: ATCGCTCGAGCGACTGAACTGCCAGGCGT<br><br>F2: ACTAGTCATGGTCCATATGAATATCC<br>R2: ATCGGGATCCGTGTAGGCTGGAGCTGCTTC                  |
| trxA::6His::Km      | F1: ATCGAAGCTTAAAATGATCGCTCCGATTC<br>R1: ATCGTCTAGATCAGTGGTGGTGGTGGTGGTGGTGGT<br><br>F2: ATTTACTAGTGTGTAGGCTGGAGCTGCTTCG<br>R2: ATTTACTAGTATTCCGGGGATCCGTCGA        |
| Point mutation      |                                                                                                                                                                     |
| ompR D55A           | F: CATCTCATGGTACTGG <b>CTTT</b> AATGCTGCCAG<br>R: CACCTGGCAGCATTAA <b>AGCC</b> AGTACCATGA                                                                           |

|                       |                                                                                                                             |
|-----------------------|-----------------------------------------------------------------------------------------------------------------------------|
| <i>ompR</i> A136D     | F: TCGCAGGAAGAG <b>GAT</b> GTTATCGCGTTC<br>R: GAACGCGATAAC <b>ATCCTCTTCCTGCGA</b>                                           |
| <i>ompR</i> V137D     | F: CAGGAAGAGGCC <b>GAT</b> ATCGCGTTCGGT<br>R: ACCGAACGCGAT <b>ATCGGCCTCTTCCTG</b>                                           |
| <i>ompR</i> I138D     | F: GAAGAGGCCGTT <b>GAT</b> GCGTTCGGTAAG<br>R: CTTACCGAACGC <b>ATCAACGGCCTCTTC</b>                                           |
| <i>ompR</i> S174D     | F: AAAGCGTTAGTC <b>GAT</b> CATCCGCGCGAG<br>R: CTCGCGCGGAT <b>GATCG</b> ACTAACGCTTT                                          |
| <i>ompR</i> E178K     | F: AGCCATCCGCGC <b>AAGCCGCTCTCTCGC</b><br>R: GCGAGAGAGCGG <b>CTTG</b> CGCGGATGGCT                                           |
| <i>ompR</i> R182D     | F: GAGCCGCTCTCT <b>GAT</b> GATAAGCTGATG<br>R: CATCAGCTTATC <b>ATC</b> AGAGAGCGGCTC                                          |
| <i>ompR</i> L228D     | F: ACCGTCTGGGGC <b>GAT</b> GGCTACGTCTTT<br>R: AAAGACGTAGCC <b>ATCG</b> CCCCAGACGGT                                          |
| <i>ompR</i> Y230D     | F: TGGGGCCTGGGC <b>GAT</b> GTCTTTGTACCG<br>R: CGGTACAAAGAC <b>ATCG</b> CCCAGGCCCA                                           |
| <i>trxA</i> C33A C36A | F: TTCTGGGCAGAGTGG <b>GCCGGGCCGGCT</b> AAAATGATCGCTC<br>R: GAGCGATCATT <b>TTAGCCGGCCCCGGCC</b> ACTCTGCCAGAA                 |
| <i>trxA</i> C33D      | F: GATTTCTGGGCAGAGTGG <b>GACGGGCCGT</b> GTAATAATGAT<br>R: ATCATT <b>TTACACGGCCCCGTCC</b> ACTCTGCCAGAAATC                    |
| <i>trxA</i> C36D      | F: AGAGTGGTGCGGGCC <b>GAT</b> AAAATGATCGCTCCG<br>R: CGGAGCGATCATT <b>TTATCGGGCCCCG</b> ACCACTCT                             |
| <i>trxA</i> R74D      | F: ATATGGCATC <b>GACGGT</b> ATTCCGACT<br>R: AGTCGGAATAC <b>CGT</b> CGATGCCATAT                                              |
| <i>trxA</i> G75D      | F: GGCATCCGC <b>GAT</b> ATTCCGACTC<br>R: GAGTCGGAAT <b>ATCG</b> CGGATGCC                                                    |
| <i>trxA</i> I73D I76D | F:<br>CGCCTAAATATGGC <b>GACCGCGGT</b> <b>GAT</b> CCGACTCTGCTGCTG<br>R:<br>CAGCAGCAGAGTCGG <b>ATCACCGCGT</b> CGCCATATTTAGGCG |
| <i>trxA</i> G93D      | F: CAACCAAAGTAG <b>GACG</b> CACTGTCTAAA<br>R: TTTAGACAGTG <b>CGTCT</b> ACTTTGGTTG                                           |
| <i>trxA</i> A94D      | F: CAAAGTAGGC <b>GAT</b> CTGTCTAAAGGT<br>R: ACCTTTAGACAG <b>ATCG</b> CCTACTTTG                                              |
| <i>trxA</i> A94D L95D | F: AACCAAAGTAGGC <b>GATGAT</b> TCTAAAGGTCAGTT<br>R: AACTGACCTTTAGAA <b>ATCAT</b> CGCCTACTTTGGTT                             |

---

Real time qRT-PCR

|                           |                                                    |
|---------------------------|----------------------------------------------------|
| <i>rpoD</i> (cyber green) | F: TGCCGATGATCTGCTGCTGG<br>R: TTCCGGGTATTCGGCAACGG |
| <i>ompF</i> (cyber green) | F: GTCACAAACCGCCAGCACG<br>R: GACCGGTTTCGGTCAGTGGG  |

|                           |                                                                                                              |
|---------------------------|--------------------------------------------------------------------------------------------------------------|
| <i>mgtA</i> (cyber green) | F: TGATACGCACCCGGAGGGAT<br>R: CGATAACGCCTGCGGCAAAC                                                           |
| <i>ssaV</i> (cyber green) | F: GGTATCGAGAGGGTGGCGGA<br>R: CCGTCCATCGCACCGAGAAA                                                           |
| <i>sifA</i> (cyber green) | F: TTGCGATGCGCAGGCTAACT<br>R: GCAAAGCAAAGCGGACCGT                                                            |
| <i>rpoD</i> (qPCR)        | F: GTGGCTTGCAATTCCTTGAT<br>R: AGCATCTGGCGAGAAATA<br><b>Probe:</b> 6-FAM- ATAAGTTCGAATACCGTCGCG-3BHQ-1        |
| <i>sifA</i> (qPCR)        | F: AGCGAAATCGTAGACTACCCC<br>R: CCAGACTGAATTTTCGCTGCC<br><b>Probe:</b> 6-FAM- CCTTTTCTTGCGCTTTCCACCCAT-3BHQ-1 |
| <i>ssrA</i> (qPCR)        | F: ATATTACGCACAACCTTGCAT<br>R: CCAGTGAGCGATGTAGTAACCA<br><b>Probe:</b> 6-FAM- AAGCCGACGTCATCAACACCA-3BHQ-1   |
| <i>ompF</i> (IVT&qPCR)    | F: AACTACATGACCAGCCGTG<br>R: CGCCATTCTGAGAGTTAATGC<br><b>Probe:</b> 6-FAM-ACGGTCTCTCTTTTCGGTATCCAGT-3BHQ-1   |

---

Gel mobility shift assay

|                  |                                                |
|------------------|------------------------------------------------|
| <i>pompF</i> DNA | F: ATTTCTTTTGAAACCAA<br>R: CATCTTTCCATTCAAATA  |
| <i>ompF</i> (-)  | F: AAACGTTAGTTTGAATGGA<br>R: ATAAACTTTACAGAAAT |

\* Restriction enzyme sites are underlined.

\*\* Point mutation sites are indicated in bold and italic.

\*\*\* IVT: *in vitro* transcription

## Supplementary References.

1. G. E. Crooks, G. Hon, J. M. Chandonia, S. E. Brenner, WebLogo: a sequence logo generator. *Genome Res* **14**, 1188-1190 (2004).
2. S. C. Potter *et al.*, HMMER web server: 2018 update. *Nucleic Acids Res* **46**, W200-W204 (2018).
3. F. Sievers *et al.*, Fast, scalable generation of high-quality protein multiple sequence alignments using Clustal Omega. *Mol Syst Biol* **7**, 539 (2011).
4. S. Sadotra *et al.*, Structural basis for promoter DNA recognition by the response regulator OmpR. *J Struct Biol* **213**, 107638 (2021).
5. M. Song, J. S. Kim, L. Liu, M. Husain, A. Vazquez-Torres, Antioxidant Defense by Thioredoxin Can Occur Independently of Canonical Thiol-Disulfide Oxidoreductase Enzymatic Activity. *Cell Rep* **14**, 2901-2911 (2016).
6. D. Hanahan, Studies on transformation of *Escherichia coli* with plasmids. *J Mol Biol* **166**, 557-580 (1983).
7. M. Husain *et al.*, Redox sensor SsrB Cys203 enhances *Salmonella* fitness against nitric oxide generated in the host immune response to oral infection. *Proc Natl Acad Sci U S A* **107**, 14396-14401 (2010).
8. J. S. Kim *et al.*, DksA-DnaJ redox interactions provide a signal for the activation of bacterial RNA polymerase. *Proc Natl Acad Sci U S A* **115**, E11780-E11789 (2018).
9. K. A. Datsenko, B. L. Wanner, One-step inactivation of chromosomal genes in *Escherichia coli* K-12 using PCR products. *Proc Natl Acad Sci U S A* **97**, 6640-6645 (2000).
10. T. Tapscott *et al.*, Guanosine tetraphosphate relieves the negative regulation of *Salmonella* pathogenicity island-2 gene transcription exerted by the AT-rich *ssrA* discriminator region. *Sci Rep* **8**, 9465 (2018).
11. R. F. Wang, S. R. Kushner, Construction of versatile low-copy-number vectors for cloning, sequencing and gene expression in *Escherichia coli*. *Gene* **100**, 195-199 (1991).
